# Supplementary material for: Understanding the perspectives and values of midwives, obstetricians and obstetric registrars regarding episiotomy: qualitative interview study
Source: PubMed Central journal article supplement — BMJ Open. 2021 Jan 13;11(1):e037536. doi: 10.1136/bmjopen-2020-037536 (PMC7812089; doi:10.1136/bmjopen-2020-037536), 2021-01-13
Supplement: bmjopen-2020-037536supp001.pdf [file bmjopen-2020-037536supp001.pdf]

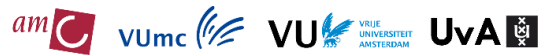

## Amsterdam Public Health

### Toelichting onderzoek voorafgaand aan informed consent

#### ***Kwalitatief onderzoek naar meningen van zorgverleners over episiotomiegebruik en hechttechnieken***

**Verantwoordelijke onderzoeker**

Anna Seijmonsbergen-Schermers  
a.seijmonsbergen@vumc.nl

**Voor vragen over gegevensbescherming:**

Michel Paardekooper (functionaris gegevensbescherming)  
michel.paardekooper@vumc.nl

**Type onderzoek:** kwalitatief wetenschappelijk onderzoek

**Methode:** het interviewen van zorgverleners in de geboortezorg

Het doel van dit kwalitatieve onderzoek is om de mening en visie van zorgverleners in de geboortezorg te onderzoeken. Het onderwerp is het gebruik van een episiotomie tijdens het begeleiden van een bevalling en hechttechnieken in de eerste en tweede lijn. Hiervoor zullen gynaecologen, arts-assistenten, tweedelijns verloskundigen en eerstelijns verloskundigen geïnterviewd worden. De resultaten zullen gerapporteerd worden in een artikel dat aangeboden zal worden aan een internationaal wetenschappelijk tijdschrift.

De gegevens en resultaten van het onderzoek zullen uitsluitend anoniem en vertrouwelijk aan derden bekend gemaakt worden en zullen gedurende tien jaar bewaard worden. Anonieme citaten kunnen letterlijk in het te publiceren artikel gerapporteerd worden.

Voor de analyses zullen de interviews middels audioapparatuur opgenomen worden. Dit audiomateriaal zal uitsluitend voor de analyses gebruikt worden en na het uitschrijven van de tekst definitief verwijderd worden.

Deelname aan dit onderzoek is geheel vrijwillig. Daarbij heeft u op ieder moment het recht om zonder opgave van redenen de deelname aan het onderzoek te beëindigen of een klacht over dit onderzoek in te dienen.
