# Supplementary material for: Understanding the perspectives and values of midwives, obstetricians and obstetric registrars regarding episiotomy: qualitative interview study
Source: PubMed Central journal article supplement — BMJ Open. 2021 Jan 13;11(1):e037536. doi: 10.1136/bmjopen-2020-037536 (PMC7812089; doi:10.1136/bmjopen-2020-037536), 2021-01-13
Supplement: bmjopen-2020-037536supp002.pdf [file bmjopen-2020-037536supp002.pdf]

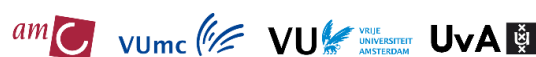

## Amsterdam Public Health

### Toestemmingsformulier (informed consent)

**Kwalitatief onderzoek naar meningen van zorgverleners over episiotomiegebruik en hechttechnieken**

#### Verantwoordelijke onderzoeker

Anna Seijmonsbergen-Schermers

#### In te vullen door de deelnemer

Ik verklaar hierbij op een voor mij duidelijke wijze, mondeling en schriftelijk, te zijn ingelicht over de aard, methode en het doel van dit kwalitatieve onderzoek. Ik weet dat de gegevens en resultaten van het onderzoek alleen anoniem en vertrouwelijk aan derden bekend gemaakt zullen worden. Anonieme citaten kunnen letterlijk in het te publiceren artikel gerapporteerd worden. Mijn eventuele vragen zijn naar tevredenheid beantwoord.

Ik geef toestemming voor het opnemen van het interview op audiomateriaal en begrijp dat het audiomateriaal uitsluitend voor analyse zal worden gebruikt en gedurende tien jaar bewaard zal worden.

Ik stem geheel vrijwillig in met deelname aan dit onderzoek. Ik behoud me daarbij het recht voor om op elk moment zonder opgave van redenen mijn deelname aan dit onderzoek te beëindigen.

Naam deelnemer:

Datum:

Handtekening deelnemer:

#### In te vullen door de uitvoerende onderzoeker

Ik heb een mondelinge en schriftelijke toelichting gegeven op het onderzoek. Ik zal resterende vragen over het onderzoek naar vermogen beantwoorden. De deelnemer zal van een eventuele voortijdige beëindiging van deelname aan dit onderzoek of klachten over dit onderzoek geen nadelige gevolgen ondervinden.

Naam onderzoeker:

Datum:

Handtekening onderzoeker:
