# Supplementary material for: Understanding the perspectives and values of midwives, obstetricians and obstetric registrars regarding episiotomy: qualitative interview study
Source: PubMed Central journal article supplement — BMJ Open. 2021 Jan 13;11(1):e037536. doi: 10.1136/bmjopen-2020-037536 (PMC7812089; doi:10.1136/bmjopen-2020-037536), 2021-01-13
Supplement: bmjopen-2020-037536supp003.pdf [file bmjopen-2020-037536supp003.pdf]

## Coding tree of article entitled

### “Understanding the perspectives and values of midwives, obstetricians, and obstetric registrars towards episiotomy: qualitative interview study”

#### 1) Vision on childbirth

- a. Harm versus protection
  - i. Effect episiotomy
  - ii. Anatomic result
  - iii. Episiotomy versus spontaneous ruptures
  - iv. Seeing episiotomy as a technical operation
- b. Tendency to intervene
  - i. Physiological versus pathological
  - ii. Perspectives on national incidences
  - iii. Variation in / vision on methods during second stage of labour
- c. Paternalistic versus client – who decides
- d. Narrow idea on others’ way of acting/thinking
  - i. Standard way of working
  - ii. Feeling of being judged by care providers from other professional background
- e. Personal evaluation
  - i. Evaluating with themselves/colleagues/woman
  - ii. Training, eagerness to learn
  - iii. Too few of overuse of episiotomies
- f. External factors
  - i. Experience
  - ii. Profession/education
  - iii. Colleagues

#### 2) Discrepancy between vision or literature and daily practice

- a. Restrictive vision versus list of indications
  - i. Fetal distress, prolonged second stage, exhaustion, instrumental birth, OASI in history, tight perineum, short perineum, prevention of long-term harm, prevention of spontaneous ruptures/OASI, prevention of instrumental birth, shoulder dystocia, breech presentation, macrosomia, care provider’s interest, specific maternal history.
  - ii. High national incidences
- b. Justification – harm versus aim
  - i. Feeling confident in policy and practice
  - ii. Feeling uncertain/unexperienced
  - iii. Intrapartum factors influencing decision making: birthing situation, maternal characteristics, medical technology, women’s desires (to a lesser extent)

- iv. Justification of high incidence in obstetric-led care
- c. Fear of the demand to justify
- d. Limitations for optimal care
  - i. Women's desires
  - ii. Lack of postpartum check-ups
  - iii. Blunt scissors
  - iv. Difficulties with evaluation
- e. Literature versus practice
  - i. Only for fetal distress
  - ii. Limitations in applying the literature
  - iii. Using literature to justify actions
  - iv. Variation in episiotomy techniques
  - v. Variation in pelvic floor protection and pushing instructions
- f. Deciding on own clinical expertise
  - i. Personal methods
  - ii. Acting autonomously
- g. Influence of other care providers:
  - i. Supervision, final responsibility
  - ii. Practices that are imposed
  - iii. Shared decisions

### 3) Women's involvement

- a. Absence of women's voice
  - i. Birth plan
- b. Absence of informed consent
  - i. Trusting bond
  - ii. Opting out
  - iii. Convincing/threatening
  - iv. Women's inability:
    - State during second stage
    - Unrealistic expectations
    - Letting go of control
    - Wrong perception of episiotomy
- c. Women's autonomy
  - i. Body integrity
  - ii. Individualized support
  - iii. Influence of birthplace
  - iv. Decision made by care provider
- d. Being informed prenatally
- e. Use of trivializing words
